# Supplementary material for: Unusual Metal-Organic Multicomponent Ni(II) and Mononuclear Zn(II) Compounds Involving Pyridine Dicarboxylates: Supamolecular Assemblies and Theoretical Studies
Source: Preprints.org preprint supplement (doi:10.20944/preprints202408.1099.v1), 2024-08-15

## checkCIF/PLATON report

Structure factors have been supplied for datablock(s) shelx

THIS REPORT IS FOR GUIDANCE ONLY. IF USED AS PART OF A REVIEW PROCEDURE FOR PUBLICATION, IT SHOULD NOT REPLACE THE EXPERTISE OF AN EXPERIENCED CRYSTALLOGRAPHIC REFEREE.

No syntax errors found.      CIF dictionary      Interpreting this report

### Datablock: shelx

---

Bond precision:      C-C = 0.0043 Å      Wavelength=1.54178

Cell:                  a=8.9375(7)                  b=12.8596(10)                  c=21.1687(17)  
                         alpha=85.416(3)                  beta=82.686(2)                  gamma=89.928(3)

Temperature:          100 K

|                        | Calculated                                                            | Reported            |
|------------------------|-----------------------------------------------------------------------|---------------------|
| Volume                 | 2405.4(3)                                                             | 2405.4(3)           |
| Space group            | P -1                                                                  | P -1                |
| Hall group             | -P 1                                                                  | -P 1                |
| Moiety formula         | 2(C14 H6 N2 Ni O8), C4 H2O<br>N4 Ni O2, C2 H16 N2 Ni O4, ?<br>4(H2 O) |                     |
| Sum formula            | C34 H56 N10 Ni4 O26                                                   | C34 H56 N10 Ni4 O26 |
| Mr                     | 1255.65                                                               | 1255.72             |
| Dx, g cm <sup>-3</sup> | 1.734                                                                 | 1.734               |
| Z                      | 2                                                                     | 2                   |
| Mu (mm <sup>-1</sup> ) | 2.641                                                                 | 2.641               |
| F000                   | 1300.0                                                                | 1300.0              |
| F000'                  | 1280.11                                                               |                     |
| h, k, lmax             | 10, 15, 25                                                            | 10, 15, 25          |
| Nref                   | 8844                                                                  | 8519                |
| Tmin, Tmax             | 0.463, 0.673                                                          | 0.263, 0.753        |
| Tmin'                  | 0.420                                                                 |                     |

Correction method= # Reported T Limits: Tmin=0.263 Tmax=0.753  
AbsCorr = MULTI-SCAN

Data completeness= 0.963      Theta(max)= 68.364

R(reflections)= 0.0559( 8443)

wR2(reflections)=  
0.1577( 8519)

S = 1.085

Npar= 692

The following ALERTS were generated. Each ALERT has the format

**test-name\_ALERT\_alert-type\_alert-level.**

Click on the hyperlinks for more details of the test.

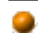

#### Alert level B

PLAT420\_ALERT\_2\_B D-H Bond Without Acceptor O3 --H3A . Please Check

**Author Response: Due to disordered solvent molecules.**

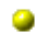

#### Alert level C

PLAT029\_ALERT\_3\_C \_diffn\_measured\_fraction\_theta\_full value Low . 0.966 Why?  
PLAT250\_ALERT\_2\_C Large U3/U1 Ratio for <U(i,j)> Tensor(Resd 1) 2.3 Note  
PLAT250\_ALERT\_2\_C Large U3/U1 Ratio for <U(i,j)> Tensor(Resd 2) 2.6 Note  
PLAT250\_ALERT\_2\_C Large U3/U1 Ratio for <U(i,j)> Tensor(Resd 3) 2.4 Note  
PLAT250\_ALERT\_2\_C Large U3/U1 Ratio for <U(i,j)> Tensor(Resd 4) 2.8 Note  
PLAT369\_ALERT\_2\_C Long C(sp2)-C(sp2) Bond C12 - C13 . 1.53 Ang.  
PLAT369\_ALERT\_2\_C Long C(sp2)-C(sp2) Bond C19 - C20 . 1.53 Ang.  
PLAT420\_ALERT\_2\_C D-H Bond Without Acceptor N2 --H2BB . Please Check

**Author Response: Due to disordered solvent molecules.**

PLAT767\_ALERT\_4\_C INS Embedded LIST 6 Instruction Should be LIST 4 Please Check  
PLAT790\_ALERT\_4\_C Centre of Gravity not Within Unit Cell: Resd. # 1 Note  
C14 H6 N2 Ni O8  
PLAT906\_ALERT\_3\_C Large K Value in the Analysis of Variance ..... 2.884 Check  
PLAT911\_ALERT\_3\_C Missing FCF Refl Between Thmin & STh/L= 0.600 299 Report  
0 2 0, 1 2 0, 1 3 0, 0 4 0, 1 4 0, 2 4 0,  
1 5 0, 1 6 0, 1 7 0, -2 15 0, 0-15 1, 1-15 1,  
2-15 1, -1 -9 1, -1 -8 1, -2 -7 1, -1 -7 1, 1 -7 1,  
-2 -6 1, -1 -6 1, 0 -6 1, -2 -5 1, -1 -5 1, 0 -5 1,  
1 -5 1, -2 -4 1, -1 -4 1, 0 -4 1, -1 -3 1, 0 -3 1,  
3 -3 1, -1 -2 1, 0 -2 1, -1 -1 1, 0 -1 1, 1 -1 1,  
2 -1 1, -1 1 1, 1 1 1, -3 3 1, 0 3 1, 1 3 1,  
-1 7 1, 1 7 1, -1 15 1, 0-15 2, 1-15 2, 2-15 2,  
-2-11 2, -1-11 2, -2 -9 2, -2 -8 2, -1 -8 2, 0 -8 2,  
-2 -7 2, -1 -7 2, -2 -6 2, -1 -6 2, 0 -6 2, 1 -6 2,  
-2 -5 2, -1 -5 2, 0 -5 2, -2 -4 2, -1 -4 2, 0 -4 2,  
-1 -3 2, 0 -3 2, -1 -2 2, 0 -2 2, 2 -2 2, 0 -1 2,  
0 0 2, 0 1 2, -5 2 2, 1 5 2, -1-15 3, 0-15 3,  
1-15 3, -2-14 3, -2-13 3, -1-13 3, -2-12 3, -1-12 3,  
-2-11 3, -1-11 3, -2-10 3, -3 -9 3, -2 -9 3, -2 -8 3,  
-1 -8 3, 0 -8 3, -3 -7 3, -2 -7 3, -1 -7 3, 0 -7 3,  
PLAT913\_ALERT\_3\_C Missing # of Very Strong Reflections in FCF .... 5 Note  
0 -2 2, 2 -2 2, -2 -3 3, -4 -4 4, 2 -2 4,

---

**Alert level G**

PLAT007\_ALERT\_5\_G Number of Unrefined Donor-H Atoms ..... 32 Report  
H00I H00J H4BB H4AA H3BB H3AA H00K H00L H9A H9B H10A  
H10B H1A H1B H2A H2B H3A H3B H4A H4B H2AA H2BB  
PLAT720\_ALERT\_4\_G Number of Unusual/Non-Standard Labels ..... 12 Note  
H00I H00J H00K H00L H4BB H4AA H3BB H3AA  
H2AA H2BB H1BB H1AA  
PLAT790\_ALERT\_4\_G Centre of Gravity not Within Unit Cell: Resd. # 2 Note  
C14 H6 N2 Ni O8  
PLAT790\_ALERT\_4\_G Centre of Gravity not Within Unit Cell: Resd. # 3 Note  
C4 H20 N4 Ni O2  
PLAT790\_ALERT\_4\_G Centre of Gravity not Within Unit Cell: Resd. # 6 Note  
H2 O  
PLAT790\_ALERT\_4\_G Centre of Gravity not Within Unit Cell: Resd. # 7 Note  
H2 O  
PLAT790\_ALERT\_4\_G Centre of Gravity not Within Unit Cell: Resd. # 8 Note  
H2 O  
PLAT790\_ALERT\_4\_G Centre of Gravity not Within Unit Cell: Resd. # 9 Note  
H2 O  
PLAT794\_ALERT\_5\_G Tentative Bond Valency for Ni1 (II) . 2.00 Info  
PLAT794\_ALERT\_5\_G Tentative Bond Valency for Ni2 (II) . 1.91 Info  
PLAT794\_ALERT\_5\_G Tentative Bond Valency for Ni3 (II) . 2.08 Info  
PLAT794\_ALERT\_5\_G Tentative Bond Valency for Ni4 (II) . 2.08 Info  
PLAT794\_ALERT\_5\_G Tentative Bond Valency for Ni5 (II) . 1.93 Info  
PLAT870\_ALERT\_4\_G ALERTS Related to Twinning Effects Suppressed .. ! Info  
PLAT883\_ALERT\_1\_G No Info/Value for \_atom\_sites\_solution\_primary . Please Do !  
PLAT899\_ALERT\_4\_G SHELXL2018 is Deprecated and Succeeded by SHELXL 2019/3 Note  
PLAT910\_ALERT\_3\_G Missing # of FCF Reflection(s) Below Theta(Min). 2 Note  
0 1 0, 0 0 1,  
PLAT912\_ALERT\_4\_G Missing # of FCF Reflections Above STh/L= 0.600 26 Note  
PLAT933\_ALERT\_2\_G Number of HKL-OMIT Records in Embedded .res File 2 Note  
1 -4 10, 3 -1 5,  
PLAT941\_ALERT\_3\_G Average HKL Measurement Multiplicity ..... 1.0 Low  
PLAT965\_ALERT\_2\_G The SHELXL WEIGHT Optimisation has not Converged Please Check  
PLAT969\_ALERT\_5\_G The 'Henn et al.' R-Factor-gap value ..... 5.478 Note  
Predicted wR2: Based on SigI\*2 2.88 or SHELX Weight 14.53

---

0 **ALERT level A** = Most likely a serious problem - resolve or explain  
1 **ALERT level B** = A potentially serious problem, consider carefully  
13 **ALERT level C** = Check. Ensure it is not caused by an omission or oversight  
22 **ALERT level G** = General information/check it is not something unexpected

1 ALERT type 1 CIF construction/syntax error, inconsistent or missing data  
10 ALERT type 2 Indicator that the structure model may be wrong or deficient  
6 ALERT type 3 Indicator that the structure quality may be low  
12 ALERT type 4 Improvement, methodology, query or suggestion  
7 ALERT type 5 Informative message, check

---

It is advisable to attempt to resolve as many as possible of the alerts in all categories. Often the minor alerts point to easily fixed oversights, errors and omissions in your CIF or refinement strategy, so attention to these fine details can be worthwhile. In order to resolve some of the more serious problems it may be necessary to carry out additional measurements or structure refinements. However, the purpose of your study may justify the reported deviations and the more serious of these should normally be commented upon in the discussion or experimental section of a paper or in the "special\_details" fields of the CIF. checkCIF was carefully designed to identify outliers and unusual parameters, but every test has its limitations and alerts that are not important in a particular case may appear. Conversely, the absence of alerts does not guarantee there are no aspects of the results needing attention. It is up to the individual to critically assess their own results and, if necessary, seek expert advice.

### **Publication of your CIF in IUCr journals**

A basic structural check has been run on your CIF. These basic checks will be run on all CIFs submitted for publication in IUCr journals (*Acta Crystallographica*, *Journal of Applied Crystallography*, *Journal of Synchrotron Radiation*); however, if you intend to submit to *Acta Crystallographica Section C* or *E* or *IUCrData*, you should make sure that full publication checks are run on the final version of your CIF prior to submission.

### **Publication of your CIF in other journals**

Please refer to the *Notes for Authors* of the relevant journal for any special instructions relating to CIF submission.

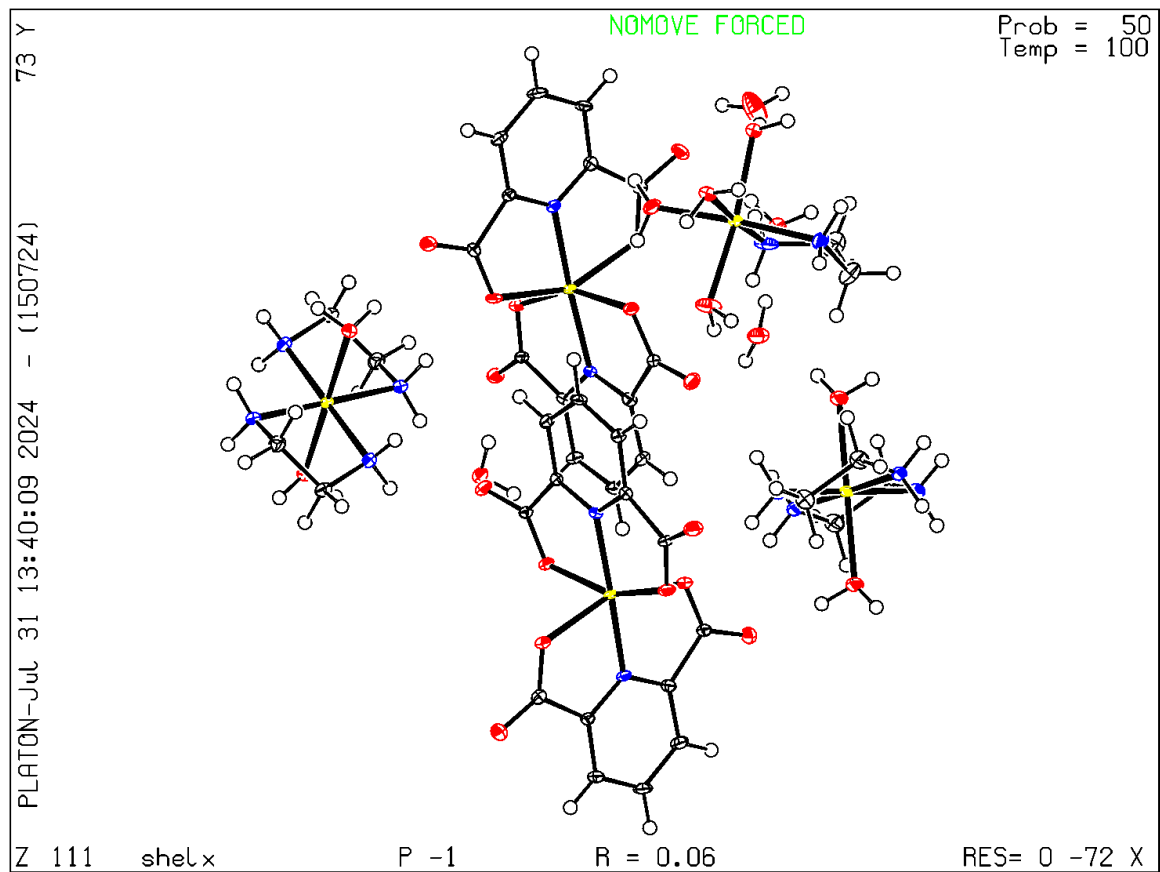

Supplement: Supplementary file 2 [file supplementary]
