# Supplementary material for: Unusual Metal-Organic Multicomponent Ni(II) and Mononuclear Zn(II) Compounds Involving Pyridine Dicarboxylates: Supamolecular Assemblies and Theoretical Studies
Source: Preprints.org preprint supplement (doi:10.20944/preprints202408.1099.v1), 2024-08-15
Supplement: Supplementary file 1 [file supplementary]

## Supplementary Information

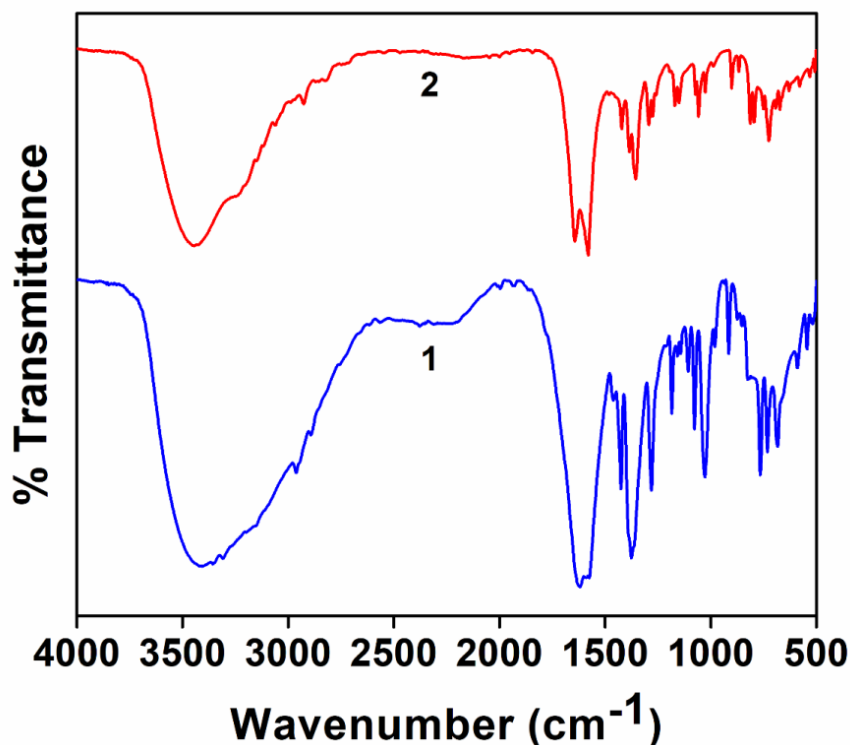

**Figure S1.** FT-IR Spectra of compounds **1** and **2**.

### 2.3.2 Electronic spectroscopy

The electronic spectra of the compounds **1** and **2** have been determined in both solid and aqueous phases (Figures S2a and S2b). Three ligand field bands at 1060, 612 and 366 nm are observed in the solid phase UV-Vis-NIR spectrum of **1** (Figure S2a) which can be attributed to the spin allowed transitions from the ground to the excited triplet states *viz.*; [ $^3A_{2g} \rightarrow ^3T_{2g}(F)$ ]( $v_1$ ), [ $^3A_{2g} \rightarrow ^3T_{1g}(F)$ ]( $v_2$ ) and [ $^3A_{2g} \rightarrow ^3T_{1g}(P)$ ]( $v_3$ ), respectively [1,2]. The absorption bands due to  $\pi \rightarrow \pi^*$  transition is obtained at 271 nm [3]. In the aqueous phase UV-Vis spectrum (Figure S2b) of **1**, the band corresponding to  $\pi \rightarrow \pi^*$  transition of the aromatic ligands is appeared at 267 nm [3]. The absorption bands at 589 nm and at 364 nm in the UV-Vis spectrum of **1** can be assigned to  $^3A_{2g}(F) \rightarrow ^3T_{1g}(F)$  and  $^3A_{2g}(F) \rightarrow ^3T_{1g}(P)$  transitions respectively for octahedral Ni(II) ions [4].

The NIR band cannot be visualized in the solution spectrum due to the limitation in the wavelength window of the spectrophotometer utilized for this purpose [5].

The spectra of **2** do not show spectral band in the visible region which can be attributed to the  $d^{10}$  electronic configuration of the Zn(II) centers that does not allow any electronic transition to the higher excited electronic states [6,7]. The absorption peaks at 229, 269 nm in UV-Vis-NIR (Figure S3a) and 221 nm, 264 nm in UV-Vis spectrum (Figure S3b) can be attributed to the  $\pi \rightarrow \pi^*$  transitions of aromatic ligands [3,8]. The marked resemblance in the absorption bands in both the phases of the spectra of compounds **1** and **2** reflects the similarities in bonding modes and the geometries of the compounds in both the phases [9,10].

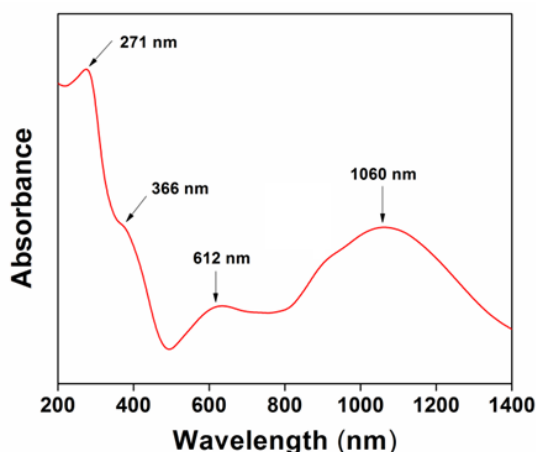

**Figure S2. (a)** UV-Vis-NIR spectrum of **1**

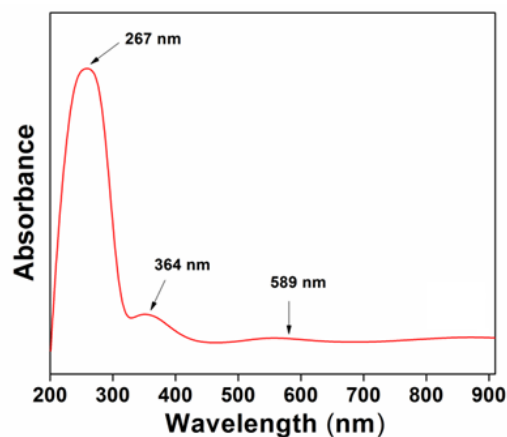

**(b)** UV-Vis spectrum of **1**

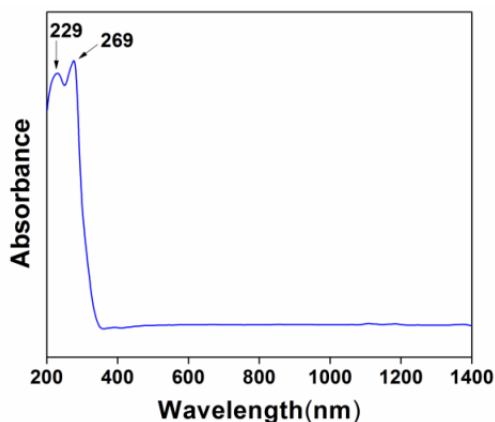

**Figure S3. (a)** UV-Vis-NIR spectrum of **2**

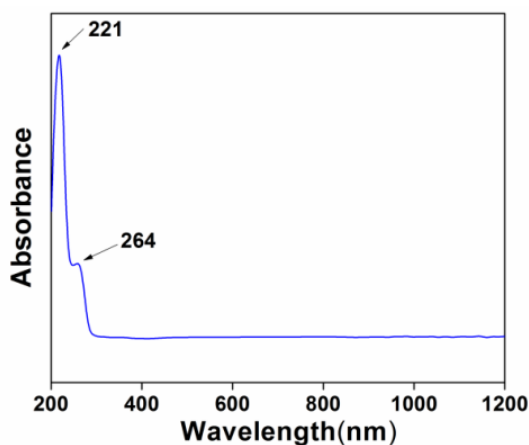

**b)** UV-Vis spectrum of **2**

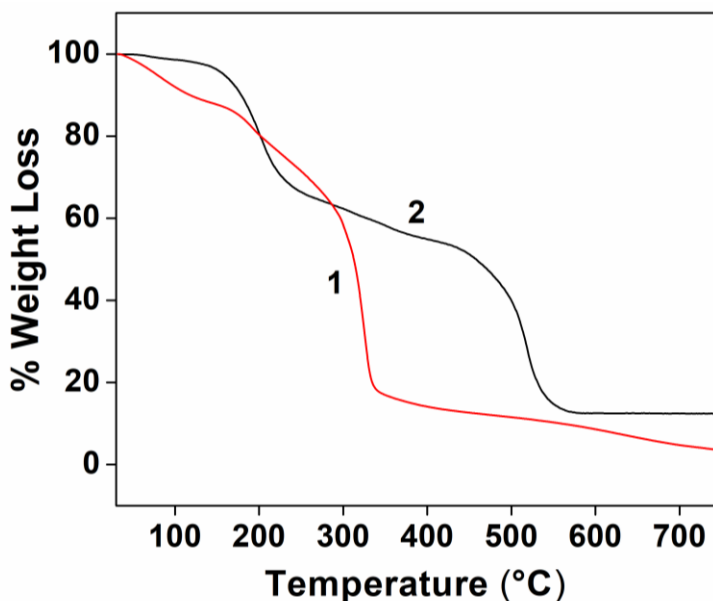

**Figure S4.** Thermogravimetric curves of the compounds **1** and **2**.

### Supplementary references

1. Mautner, F.A.; Scherzer, M.; Berger, C.; Fischer, R.C.; Vicente, R.; Massoud, S.S. Synthesis and Characterization of Five New Thiocyanato- and Cyanato-Metal(II) Complexes with 4-Azidopyridine as Co-ligand. *Polyhedron* **2015**, *85*, 20–26.
2. Figgis, B.N.; Hitchman, M.A. *Ligand Field Theory and Its Applications*; Wiley-VCH: New York, 2000; 209.
3. Bordbar, M.; Tabatabaee, M.; Alizadeh-Nouqi, M.; Mehri-Lighvan, Z.; Khavasi, H.R.; YeganehFaal, A.; Fallahian, F.; Dolati, M. Synthesis, Characterization, Cytotoxic Activity and DNA-Binding Studies of Cobalt(II) Mixed-Ligand Complex Containing Pyridine-2,6-dicarboxylate Ion and 2-Aminopyrimidine. *J. Iran. Chem. Soc.* **2016**, *13* (7), 1125–1132.
4. Sharma, P.; Sarma, P.; Frontera, A.; Hussain, S.; Verma, A.K.; Bhattacharyya, M.K. Energetically Significant Anti-Parallel  $\pi$ -Stacking and Unconventional Anion- $\pi$  Interactions in Phenanthroline Based Ni(II) and Cu(II) Coordination Compounds:

Antiproliferative Evaluation and Theoretical Studies. *Inorg. Chim. Acta* **2021**, 516, 120082.

5. Dutta, D.; Nashre-ul-Islam, S.M.; Saha, U.; Frontera, A.; Bhattacharyya, M.K. Cu(II) and Co(II) Coordination Solids Involving Unconventional Parallel Nitrile( $\pi$ )–Nitrile ( $\pi$ ) and Energetically Significant Cooperative Hydrogen Bonding Interactions: Experimental and Theoretical Studies. *J. Mol. Struct.* **2019**, 1195, 733–743.
6. Araújo, E.L.; Barbosa, H.F.G.; Dockal, E.R.; Cavaleiro, E.T.G. Synthesis, Characterization and Biological Activity of Cu(II), Ni(II) and Zn(II) Complexes of Biopolymeric Schiff Bases of Salicylaldehydes and Chitosan. *Int. J. Biol. Macromol.* **2017**, 95, 168.
7. Ekennia, A.C.; Onwudiwe, D.C.; Osowole, A.A.; Olasunkanmi, L.O.; Ebenso, E.E. Synthesis, Biological, and Quantum Chemical Studies of Zn(II) and Ni(II) Mixed-Ligand Complexes Derived from N,N-Disubstituted Dithiocarbamate and Benzoic Acid. *J. Chem.* **2016**, 55, 1.
8. Chakravorty, S.; Platts, J.A.; Das, B.K. Novel C–H $\cdots$ C Contacts Involving 3,5-Dimethylpyrazole Ligands in a Tetracoordinate Co(II) Complex. *Dalton Trans.* **2011**, 40, 11605.
9. Ghosh, M.; Majee, A.; Nethaji, M.; Chattopadhyay, T. Syntheses and Characterization of Trans-[NiL<sub>2</sub>(NCS)<sub>2</sub>][L= 2-(Aminomethyl)Pyridine], Trans-[NiL<sub>2</sub>'(NSC)<sub>2</sub>][L'= 2-(2-Aminoethyl) Pyridine] and Trans-[NiL<sub>2</sub>''(NSC)<sub>2</sub>][L''= 2-(2-Methylaminoethyl) Pyridine] Complexes: X-Ray Single Crystal Structure of Trans-[NiL<sub>2</sub>'(NSC)<sub>2</sub>][L'= 2-(2-Aminoethyl) Pyridine]. *Inorg. Chim. Acta* **2009**, 362, 2052–2055.
10. Bhattacharyya, M.K.; Gogoi, A.; Chetry, S.; Dutta, D.; Verma, A.K.; Sarma, B.; Franconetti, A.; Frontera, A. Antiproliferative Evaluation and Supramolecular Association in Mn(II) and Zn(II) Bipyridine Complexes: Combined Experimental and Theoretical Studies. *J. Inorg. Biochem.* **2019**, 200, 110803.
